# Supplementary material
Source: PubMed Central journal article supplement (PMC7483416)

# Supplementary Figure S1 – Penkert et. al.

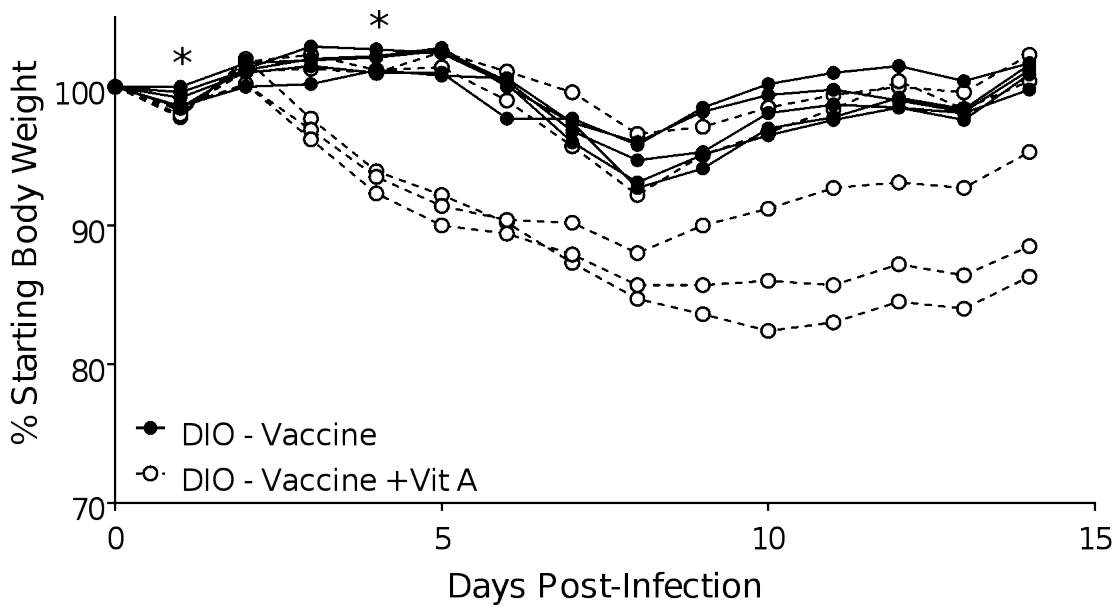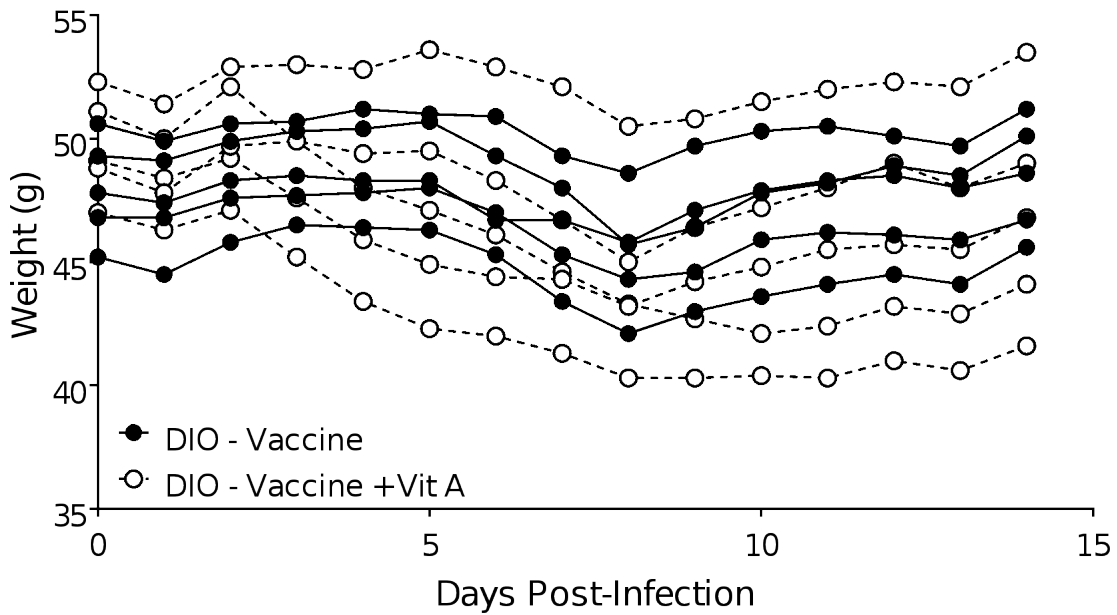

Supplement: NIHMS1600508-supplement-1.pdf [file NIHMS1600508-supplement-1.pdf]
